# Supplementary material for: Dynamic Evaluation of Agricultural Drought Hazard in Northeast China Based on Coupled Multi-Source Data
Source: MDPI journal article supplement (doi:10.3390/rs15010057), 2022-12-22
Supplement: s1 [file s1]

Archive with 1 entries (1 files):
- remotesensing-2023994-supplementary.pdf
