# Supplementary material for: Dynamic Evaluation of Agricultural Drought Hazard in Northeast China Based on Coupled Multi-Source Data
Source: MDPI journal article supplement (doi:10.3390/rs15010057), 2022-12-22
Supplement: s1 [file s1 › remotesensing-2023994-supplementary.pdf]

## Supplementary Materials:

# Dynamic Evaluation of Agricultural Drought Hazard in Northeast China Based on Coupled Multi-Source Data

Kaiwei Li <sup>1,2,3,4</sup>, Chunyi Wang <sup>5</sup>, Guangzhi Rong <sup>1</sup>, Sicheng Wei <sup>1</sup>, Cong Liu <sup>1</sup>, Yueting Yang <sup>1</sup>, Bilige Sudu <sup>1</sup>, Ying Guo <sup>1</sup>, Qing Sun<sup>5</sup>, Jiquan Zhang <sup>1,2,3,4,\*</sup>

<sup>1</sup> School of Environment, Northeast Normal University, Changchun 130024, China

<sup>2</sup> Jilin Province Science and Technology Innovation Center of Agro-Meteorological Disaster Risk Assessment and Prevention, Northeast Normal University, Changchun 130024, China

<sup>3</sup> Key Laboratory for Vegetation Ecology, Ministry of Education, Changchun 130024, China

<sup>4</sup> State Environmental Protection Key Laboratory of Wetland Ecology and Vegetation Restoration, Northeast Normal University, Changchun 130024, China

<sup>5</sup> Chinese Academy of Meteorological Sciences, Beijing 100081, China

\* Correspondence: zhangjq022@nenu.edu.cn; Tel.: +86-135-9608-6467

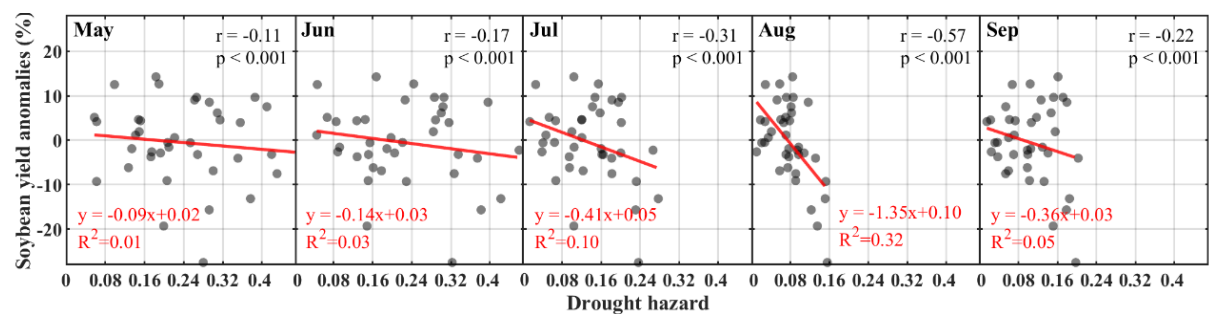

**Figure S1.** Linear relationship between climatic yield anomalies and drought hazard during the growing season for soybean in Heilongjiang Province.
